# Supplementary material for: TGF-β Induction of miR-143/145 Is Associated to Exercise Response by Influencing Differentiation and Insulin Signaling Molecules in Human Skeletal Muscle
Source: MDPI journal article supplement (doi:10.3390/cells10123443), 2021-12-07
Supplement: s1 [file s1]

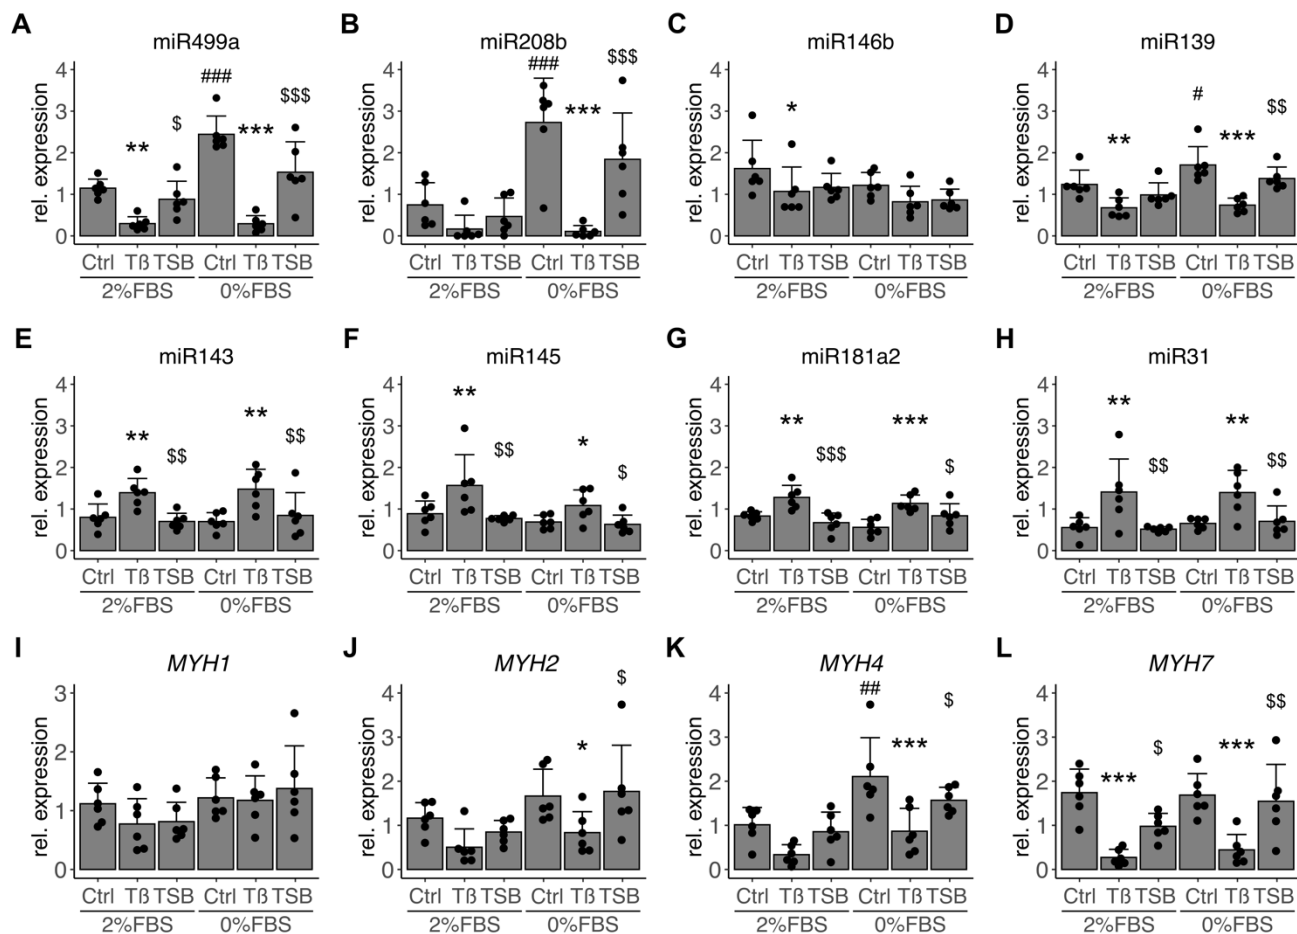

**Figure S1.** Increased expression of muscle-specific RNAs in myotubes differentiated at complete absence of FBS. Primary human myoblasts (n=6) were treated with 1 ng/ml TGF- $\beta$ 1 (T $\beta$ ), TGF- $\beta$ 1 plus inhibitor (10  $\mu$ M SB431542) (TSB), or vehicle control (Ctrl) for 48 h. Subsequently, myoblasts were differentiated towards myotubes for 5 days in the presence (2%) or absence (0%) of FBS. Expression of mature miRNA (A) miR-499a-5p, (B) miR-208b, (C) miR-146b-5p, (D) miR-139-5p, (E) miR-143-3p, (F) miR-145-5p, (G) miR-181a2-5p, (H) miR-31-5p and mRNA (I) *MYH1*, (J) *MYH2*, (K) *MYH4*, (L) *MYH7* was detected by qPCR. All qPCR data were normalized to individual donors and reference RNU6 (miRNAs) or mean of *RPS28* and *TBP* (mRNA). Individual datapoints are displayed, bars represent mean  $\pm$  SD. All data were analyzed using one-way ANOVA with Bonferroni correction, \*  $p < 0.05$ , \*\*  $p < 0.01$ , \*\*\*  $p < 0.001$  vs Ctrl at same FBS concentration, \$  $p < 0.05$ , \$\$  $p < 0.01$ , \$\$\$  $p < 0.001$  vs T $\beta$  at same FBS concentration, #  $p < 0.05$ , ##  $p < 0.01$ , ###  $p < 0.001$  0% vs 2% FBS.

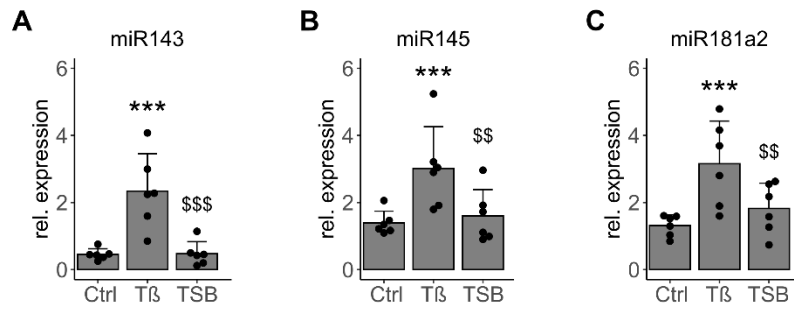

**Figure S2.** TGF- $\beta$  regulates miR-143-3p/145-5p and miR-181a2-5p in myoblasts

Primary human myoblasts (n=6) were treated with 1 ng/ml TGF- $\beta$ 1 (T $\beta$ ), TGF- $\beta$ 1 plus inhibitor (10  $\mu$ M SB431542) (TSB), or vehicle control (Ctrl) for 48 h. Expression of mature miRNA (A) miR-143-3p, (B) miR-145-5p, (C) miR-181a2-5p was detected by qPCR. All qPCR data were normalized to individual donors and reference RNU6.

Individual datapoints are displayed, bars represent mean  $\pm$  SD. All data were analyzed using one-way ANOVA with Bonferroni correction, \*\*\* p<0.001 vs Ctrl, \$\$ p<0.01, \$\$\$ p<0.001 vs T $\beta$ .

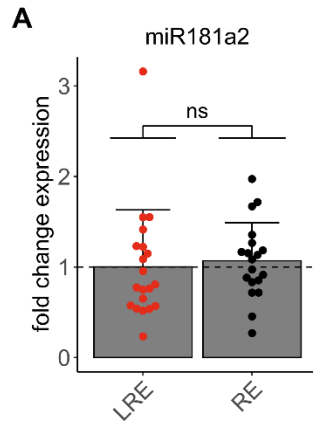

**Figure S3.** No miR-181a2-5p induction in low-responders with elevated TGF- $\beta$  signaling by training  
Middle aged sedentary individuals (n=40) were grouped into low-responders (LRE, red) and responders (re, black) based on their improvement (fold change > 1.1) in insulin sensitivity (ISIMats) after 8 weeks of training intervention. (A) Expression of mature miRNA miR-181a2-5p was detected in muscle biopsies by qPCR, normalized to individual donors and reference RNU6. Individual datapoints are displayed, bars represent mean  $\pm$  SD. Data were analyzed using one-way ANOVA with Fisher's LSD post-hoc test.

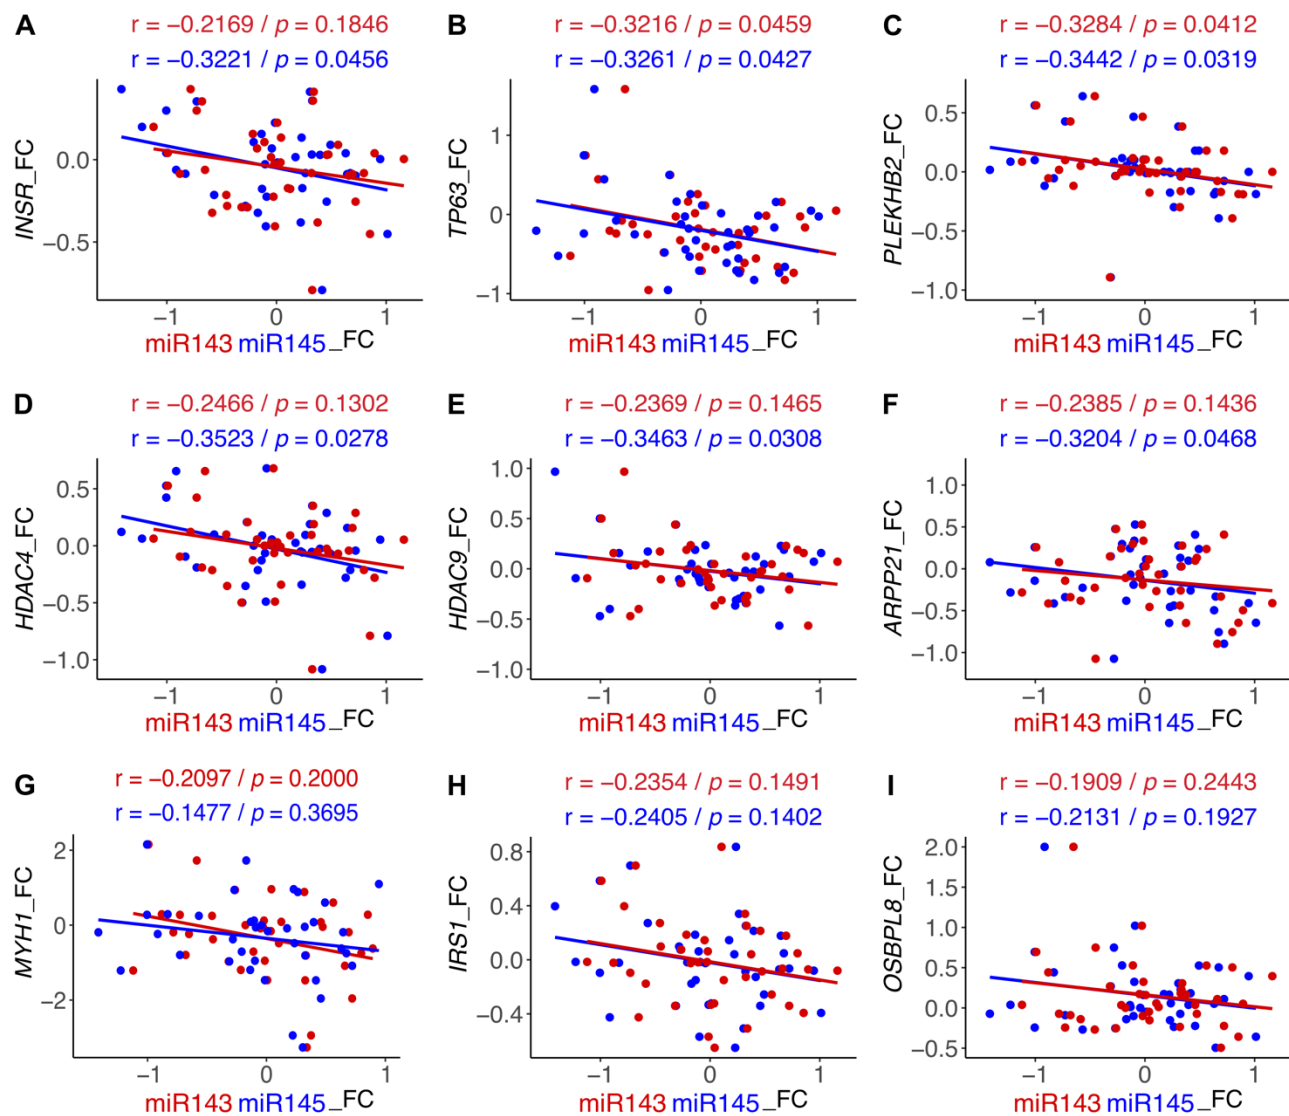

**Figure S4.** Correlation of miR-143/145 and potential skeletal muscle specific target fold changes after training. Muscle biopsies were taken from middle aged sedentary individuals (n=40) before and after 8 weeks of training intervention. RNA isolated from muscle biopsies was used for transcriptome analyses and detection of miRNAs via qPCR. (A-I) qPCR data were normalized to individual donors and reference RNU6. Correlation analyses were performed between fold changes (after intervention vs. before intervention) of miR-143-3p/145-5p and potential targets. Data were analyzed using Pearson correlation, coefficient  $r$  and  $p$ -values are indicated.

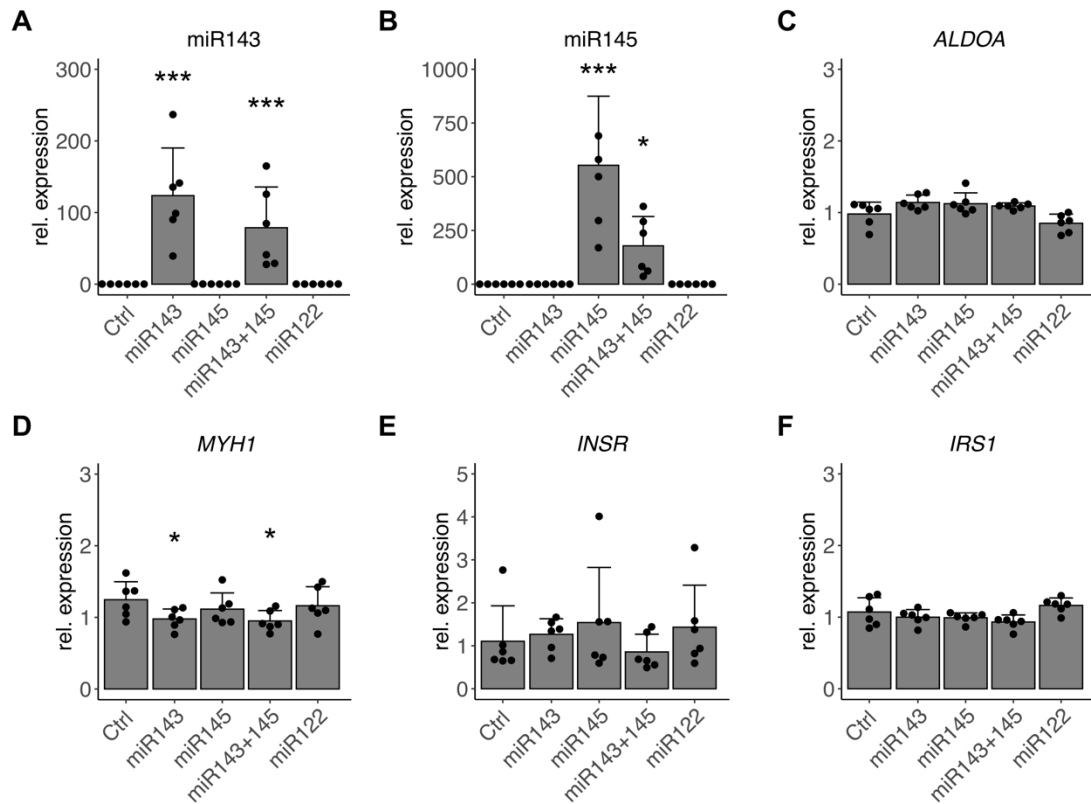

**Figure S5.** miR-143/145 downregulate components of skeletal muscle differentiation after 96 h

Primary human myoblasts (n=6) were differentiated towards myotubes for 5 days in the absence of FBS and subsequently transfected with miR-143-3p, miR-145-5p, a combination of miR-143-3p and miR-145-5p, control miR-122-5p, or vehicle control (Ctrl) for 96 h. Expression of mature miRNA (A) miR-143-3p, (B) miR-145-5p was detected by qPCR. (C) mRNA levels of (C) miR-122-5p target *ALDOA*, (D) *MYH1*, (E) *INSR* and (F) *IRS1* were detected by qPCR. All qPCR data were normalized to individual donors and reference RNU6 (miRNAs) or *RPS28* and *TBP* (mRNA). Individual datapoints are displayed, bars represent mean  $\pm$  SD. All data were analyzed using one-way ANOVA with Fisher's LSD post-hoc test, \*  $p < 0.05$ , \*\*\*  $p < 0.001$  vs Ctrl.

|                 |                | miR143 | p vs. Ctrl | miR145 | p vs. Ctrl | miR143+145 | p vs. Ctrl |
|-----------------|----------------|--------|------------|--------|------------|------------|------------|
| Differentiation | <i>MYH1</i>    | 0.82   | 0.0304     | 0.91   | n.s.       | 0.79       | 0.0179     |
|                 | <i>MYH2</i>    | 1.07   | n.s.       | 0.96   | n.s.       | 0.92       | n.s.       |
|                 | <i>MYH4</i>    | 0.98   | n.s.       | 0.93   | n.s.       | 0.95       | n.s.       |
|                 | <i>MYH7</i>    | 0.94   | n.s.       | 0.95   | n.s.       | 1.07       | n.s.       |
| Targets         | <i>ARPP21</i>  | 0.96   | n.s.       | 0.84   | 0.0088     | 0.98       | n.s.       |
|                 | <i>FNBP1</i>   | 1.19   | n.s.       | 1.29   | 0.0254     | 1.12       | n.s.       |
|                 | <i>HDAC4</i>   | 1.18   | n.s.       | 1.14   | n.s.       | 1.16       | n.s.       |
|                 | <i>HDAC9</i>   | 1.38   | n.s.       | 1.08   | n.s.       | 1.40       | n.s.       |
|                 | <i>INSR</i>    | 1.50   | n.s.       | 1.88   | n.s.       | 1.11       | n.s.       |
|                 | <i>IRS1</i>    | 0.97   | n.s.       | 0.95   | n.s.       | 0.90       | n.s.       |
|                 | <i>OSBPL8</i>  | 1.07   | n.s.       | 1.03   | n.s.       | 1.09       | n.s.       |
|                 | <i>PLEKHB2</i> | 1.05   | n.s.       | 0.97   | n.s.       | 1.01       | n.s.       |
|                 | <i>TP63</i>    | 0.84   | 0.0481     | 1.01   | n.s.       | 0.89       | n.s.       |

**Table S1.** Regulation of potential targets by miR-143/145 in differentiated skeletal muscle cells after 96 h  
Primary human myoblasts (n=6) were differentiated towards myotubes for 5 days in the absence of FBS and subsequently transfected with miR-143-3p, miR-145-5p, a combination of miR-143-3p and miR-145-5p, control miR-122-5p, or vehicle control (Ctrl) for 96 h. Expression of mature miRNA miR-143-3p, miR-145-5p and mRNA levels of potential targets were detected by qPCR. All qPCR data were normalized to individual donors and reference RNU6 (miRNAs) or mean of RPS28 and TBP (mRNA). The mean fold change compared to Ctrl is listed. Statistical analyses were performed on rel. expression values using one-way ANOVA with Fisher's LSD post-hoc test, p<0.05.

| RNA              | Primer            | Cat. Nr.            | Protein                   | Antibody          | Cat. Nr.  |
|------------------|-------------------|---------------------|---------------------------|-------------------|-----------|
| <i>ARPP21</i>    | Hs_ARPP21_3_SG    | QT01192562          | <b>pAKT[S473]</b>         | Cell Signaling    | 9271L     |
| <i>FNBP1</i>     | Hs_FNBP1_1_SG     | QT00030198          | <b>tAKT</b>               | BD                | 610860    |
| <i>HDAC4</i>     | Hs_HDAC4_1_SG     | QT00005810          | <b>INSR</b>               | Cell Signaling    | 3025      |
| <i>HDAC9</i>     | Hs_HDAC9_1_SG     | QT00039333          | <b>IRS1</b>               | Millipore         | 06-248    |
| <i>INSR</i>      | Hs_INSR_1_SG      | QT00082810          | <b>MyHfast</b>            | Sigma Clone MY-32 | M4276     |
| <i>IRS1</i>      | Hs_IRS1_1_SG      | QT00074144          | <b>OSBPL8</b>             | Abcam             | AB60110   |
| <i>MYH1</i>      | Hs_MYH1_2_SG      | QT01671005          | <b>GAPDH</b>              | Abcam             | AB8245    |
| <i>MYH2</i>      | Hs_MYH2_1_SG      | QT00082495          | <b>donkey anti-rabbit</b> | Licor             | 926-68023 |
| <i>MYH4</i>      | Hs_MYH4_2_SG      | QT01668779          | <b>donkey anti-mouse</b>  | Licor             | p26-68022 |
| <i>MYH7</i>      | Hs_MYH7_1_SG      | QT00000602          | <b>goat anti-mouse</b>    | Licor             | 925-68070 |
| <i>OSBPL8</i>    | Hs_OSBPL8_1_SG    | QT00067102          | <b>goat anti-rabbit</b>   | Licor             | 926-32211 |
| <i>PLEKHB2</i>   | Hs_PLEKHB2_1_SG   | QT00082936          |                           |                   |           |
| <i>TP63</i>      | Hs_TP63_2_SG      | QT02424051          |                           |                   |           |
| <i>RPS28</i>     | Hs_RPS28_2_SG     | QT02310203          |                           |                   |           |
| <i>TBP</i>       | Hs_TBP_1_SG       | QT00000721          |                           |                   |           |
| <b>miR-31</b>    | hsa-miR-31-5p     | MS00003290 / 002279 |                           |                   |           |
| <b>miR-139</b>   | hsa-miR-139-5p    | MS00003493          |                           |                   |           |
| <b>miR-143</b>   | hsa-miR-143-3p    | MS00003514 / 002249 |                           |                   |           |
| <b>miR-145</b>   | hsa-miR-145-5p    | MS00003528 / 002278 |                           |                   |           |
| <b>miR-146b</b>  | hsa-miR-146b-5p   | MS00003542          |                           |                   |           |
| <b>miR-181a2</b> | hsa-miR-181a-2-3p | MS00008834 / 000480 |                           |                   |           |
| <b>miR-208b</b>  | hsa-miR-208b      | MS00009058          |                           |                   |           |
| <b>miR-499a</b>  | hsa-miR-499a-5p   | MS00004375          |                           |                   |           |
| <b>RNU6</b>      | RNU6              | MS00033740          |                           |                   |           |

**Table S2.** Primer Assays and Antibodies

Indicated miRNAs were measured with either Qiagen/TaqMan Assays.
